# Supplementary material
Source: publisher figshare collection journal article supplement (https://gsajournals.figshare.com/ndownloader/files/21385125)
Supplement: Supplementary file 1 [file 21385125]

## Sheet: KlSir2 2012 only
Klacits ORF	Klactis gene	Scer ortholog	Scer gene	MA2Cscore	logFC sir2/wt 2012	logFC sir2/wt 2016	logFC sum1/wt 2016	ScHst1 regulated	category	subcategory	description
KLLA0D00330g				4.1178	2.86833	0.684288	-0.199177	N	Membranes & cell wall	cell wall protein	beta-glucosidase, hydrolyzes glycosidic bonds in polysaccharides such as beta-glucan
KLLA0E01057g		YDR077W/YER150W	SED1/SPI1	1.0632	1.07721	0.229145	0.182568	N	Membranes & cell wall	cell wall protein	GPI-cell wall glycoprotein; stress-induced
KLLA0E14631g				1.3748	4.65711	0.570746	0.26372	N	Membranes & cell wall	cell wall protein	beta-glucosidase, hydrolyzes glycosidic bonds in polysaccharides such as beta-glucan
KLLA0A01089g		YFR043C	IRC6	1.5496	1.04402	0.971246	1.10088	N	Membranes & cell wall	vesicle trafficking	Clathrin coat accessory factor; involved in clathrin-mediated vesicle trafficking
KLLA0B07535g		YJL154C	VPS35	1.0789	1.09026	-0.174135	-0.597619	N	Membranes & cell wall	vesicle trafficking	Endosomal subunit of retromer complex required for retrograde transport
KLLA0C17006g		YGL023C	PIB2	1.0275	1.13528	0.348091	0.101813	N	Membranes & cell wall	vesicle trafficking	Protein with FYVE domain, which binds PIP3 and tethers protein to membrane
KLLA0F09911g		YGL206C	CHC1	3.8384	1.07089	-0.288244	-0.326765	N	Membranes & cell wall	vesicle trafficking	Clathrin heavy chain, involved in intracellular protein transport and endocytosis
KLLA0B05247g		YLR438W	CAR2	1.044	1.1485	0.397554	0.444238	N	Metabolism	amino acid catabolism	L-ornithine transaminase (OTAse), second step of arginine degradation
KLLA0D12342g		YDL168W	SFA1	1.0656	1.80474	0.345951	0.37243	N	Metabolism	amino acid catabolism - Ehrlich pathway	Bifunctional alcohol and formaldehyde dehydrogenase, involved in phe/trp degradation with ARO8 and ARO10
KLLA0E02707g		YDR380W	ARO10	2.2652	1.15324	0.742803	0.313958	Y	Metabolism	amino acid catabolism - Ehrlich pathway	Phenylpyruvate decarboxylase; catalyzes first specific step in the Ehrlich pathway; function overlaps with PDC6
KLLA0E22089g				1.0162	1.42123	0.0234479	-0.875336	N	Metabolism	amino acid metabolism	Related to ARG8 and CAR2 - Acetylornithine aminotransferase and ornithine aminotransferase; involved in arginine biosynthesis and degradation
KLLA0A06886g		YKR039W	GAP1	0.8858	1.26989	0.358053	-0.167185	N	Metabolism	amino acid transport	general amino acid permease; involved in uptake of extracellular amino acids; one of two tandem K.lactis genes related to GAP1
KLLA0B07491g		YJL156C	SSY5	1.0845	1.16782	0.424191	-0.204364	N	Metabolism	amino acid transport	Serine protease of SPS amino acid sensor, activates transcription factor that induces aa permease genes
KLLA0F04125g				1.6265	1.82318	0.471144	0.146319	N	Metabolism	amino acid transport	putative amino acid permease
KLLA0A03333g		YAL054C	ACS1	1.0894	2.53733	-0.684487	-1.31698	N	Metabolism	carbon metabolism - acetate utilization	Acetyl-coA synthetase isoform
KLLA0E10561g		YBL015W	ACH1	1.2623	1.19276	-0.0761051	-0.89692	N	Metabolism	carbon metabolism - acetate utilization	Protein with CoA transferase activity, required for acetate utilization
KLLA0B09064g	ADH3	YMR303C/YOL086C/YBR145W/YMR083W	ADH2/1/5/3	3.0708	2.89402	-0.274367	-4.41445	N	Metabolism	carbon metabolism - ethanol utilization	Alcohol dehydrogenase; catalyzes interconversion of ethanol and acetaldhyde; one of four K.lactis ADH genes; has no Scer syntenic ortholog; ScADH2 is only one of four S.cerevisiae ADH genes lacking Klac syntenic ortholog
KLLA0F00440g		YOR374W	ALD4	1.5693	3.43264	0.458973	-3.54267	N	Metabolism	carbon metabolism - ethanol utilization	Mitochondrial aldehyde dehydrogenase; required for growth on ethanol and conversion of acetaldehyde to acetate
KLLA0F18260g	ADH2	YMR303C/YOL086C/YBR145W/YMR083W	ADH2/1/5/3	1.9096	1.71775	-0.693064	-2.23089	N	Metabolism	carbon metabolism - ethanol utilization	Alcohol dehydrogenase; catalyzes interconversion of ethanol and acetaldhyde; one of four K.lactis ADH genes; has no Scer syntenic ortholog; ScADH2 is only one of four S.cerevisiae ADH genes lacking Klac syntenic ortholog
KLLA0C13431g		YOR100C	CRC1	1.1336	2.11554	0.309968	0.106252	N	Metabolism	carbon metabolism - fatty acid oxidation	carnitine-dependent transport of acetyl-CoA during fatty acid beta-oxidation
KLLA0E13817g		YKR009C	FOX2	6.963	1.88411	0.267761	0.187728	N	Metabolism	carbon metabolism - fatty acid oxidation	3-hydroxyacyl-CoA dehydrogenase and enoyl-CoA hydratase; peroxisomal fatty acid beta-oxidation pathway
KLLA0F11484g		YPL147W	PXA1	1.0661	1.37711	0.382885	0.216651	N	Metabolism	carbon metabolism - fatty acid oxidation	Subunit of transport complex to import long-chain fatty acids into peroxisomes, complex with Pxa2
KLLA0F08393g	GAL1	YBR020W/YDR009W	GAL1/3	2.265	2.77307	-0.490738	-1.34222	N	Metabolism	carbon metabolism - galactose utilization	Galactokinase, first step of galactose catabolism
KLLA0F08415g	GAL10	YBR019C	GAL10	2.265	3.01809	-0.578234	-1.80343	N	Metabolism	carbon metabolism - galactose utilization	catalyzes interconversion of UDP-galactose and UDP-D-glucose in galactose metabolism
KLLA0A00484g		YKR097W	PCK1	1.661	1.05773	-0.747057	-1.59757	N	Metabolism	carbon metabolism - gluconeogenesis	Phosphoenolpyruvate carboxykinase, key enzyme in gluconeogenesis
KLLA0A00418g		YIL155C	GUT2	1.3578	2.04734	-0.581027	-2.19119	N	Metabolism	carbon metabolism - glycerol	Mitochondrial glycerol-3-phosphate dehydrogenase; involved in glycerol utilization; involved in glycerol-3-phosphate shuttle and NAD/NADH balance
KLLA0D03278g		YPL201C	YIG1	1.2608	1.15394	0.798373	-1.12247	N	Metabolism	carbon metabolism - glycerol	Protein that interacts with glycerol 3-phosphatase, may regulate glycerol production
KLLA0A05709g		YKR058W/YJL137C	GLG2/1	1.2262	2.1967	0.437445	0.349883	N	Metabolism	carbon metabolism - glycogen	Glycogenin glucosyltransferase; self-glucosylating initiator of glycogen synthesis
KLLA0D09240g		YOR178C/YLR273C	GAC1/PIG1	1.3084	3.25525	-0.227599	-1.02389	N	Metabolism	carbon metabolism - glycogen	Regulatory subunit for Glc7p type-1 protein phosphatase (PP1), tethers Glc7 to glycogen synthase (Gsy2), activates Gsy2
KLLA0F04059g		YIL099W	SGA1	2.6702	1.40907	0.42293	-0.363008	N	Metabolism	carbon metabolism - glycogen utilization	Intracellular sporulation-specific glucoamylase
KLLA0F08954g		YFL030W	AGX1	1.0875	2.07552	0.920889	0.440014	N	Metabolism	carbon metabolism - glyoxylate	Alanine:glyoxylate aminotransferase (AGT); catalyzes the synthesis of glycine from glyoxylate
KLLA0F17050g		YDL078C	MDH3	1.286	1.34786	0.0843383	-0.98146	N	Metabolism	carbon metabolism - glyoxylate	Peroxisomal malate dehydrogenase; involved in glyoxylate cycle
KLLA0F23914g		YNL117W	MLS1	1.0529	2.37613	0.88721	-0.373447	N	Metabolism	carbon metabolism - glyoxylate	Malate synthase; involved in glyoxylate cycle
KLLA0F12760g		YCR005C/YNR001C	CIT2/ CIT1	1.5442	1.11738	-0.538715	-1.31416	Y	Metabolism	carbon metabolism - glyoxylate cycle	Citrate synthase; catalyzes condensation of acetyl coA and oxaloacetate to form citrate; Cit2p involved in glyoxylate cycle, Cit1p in TCA cycle
KLLA0B14861g	LAC12			1.5159	1.58182	-0.603703	-1.73986	N	Metabolism	carbon metabolism - lactose utilization	Lactose permease
KLLA0B14883g	LAC4			10.2668	1.91838	-0.578377	-2.30589	N	Metabolism	carbon metabolism - lactose utilization	Beta-galactosidase
KLLA0E13905g		YPR006C	ICL2	6.963	2.27406	0.151671	0.109217	N	Metabolism	carbon metabolism - propionate utilization	2-methylisocitrate lyase of the mitochondrial matrix; functions in the methylcitrate cycle
KLLA0A11110g	HGT1			2.6249	3.45201	0.283528	-3.04251	N	Metabolism	carbon metabolism - sugar transport	High affinity glucose transporter; related to glucose sensors and transporters in S.cerevisiae, but not their top hit
KLLA0D11352g		YGL253W/YFR053C	HXK2/1	1.1011	1.43391	0.0341727	-0.321915	N	Metabolism	carbon metabolism - sugar transport	Hexokinase isoenzyme
KLLA0E06755g				1.2754	1.65939	0.531702	-2.1186	N	Metabolism	carbon metabolism - sugar transport	Putative xylose transporter; member of sugar transporter family of major facilitator superfamily
KLLA0F25630g		YKL038W	RGT1	1.9988	1.69971	0.323157	-0.473302	N	Metabolism	carbon metabolism - sugar transport	transcription factor that regulates glucose transporter (HXT) genes
KLLA0B03355g		YDL066W	IDP1	1.6537	2.7055	0.82968	-0.552124	N	Metabolism	carbon metabolism - TCA cycle	isocitrate dehydrogenase
KLLA0C17314g		YLR304C	ACO1	1.9306	1.38152	-0.256679	-1.69315	N	Metabolism	carbon metabolism - TCA cycle	Aconitase
KLLA0E00683g		YLL041C	SDH2	1.7234	2.26945	-0.136455	-1.37111	N	Metabolism	carbon metabolism - TCA cycle	succinate dehydrogenase
KLLA0F04477g		YIL125W	KGD1	1.3751	1.3413	0.192412	-0.661837	N	Metabolism	carbon metabolism - TCA cycle	Subunit of mitochondrial alpha-ketoglutarate dehydrogenase complex; catalyzes oxidative decarboxylation of alpha-ketoglutarate to form succinyl-CoA, a step in TCA cycle
KLLA0B10263g		YMR196W	YMR196W	6.5815	1.35928	-0.136739	-0.662889	N	Metabolism	carbon metabolism - trehalose	protein of unknown function localized to cytoplasm; has trehalase domain
KLLA0B00385g		YNR056C	BIO5	6.0089	1.06069	-0.0425764	0.114328	N	Metabolism	cofactor - biotin homeostasis	transporter of biotin precursor 7-keto 8-aminopelargonic acid
KLLA0C06721g		YDR400W	URH1	5.4034	1.49685	0.277829	0.116354	N	Metabolism	cofactor - NAD homeostasis	Uridine nucleosidase, involved in pyrimidine and nicotinamide riboside salvage pathways
KLLA0D03146g		YGL067W	NPY1	1.3377	1.13594	0.110751	0.0791832	N	Metabolism	cofactor - NAD homeostasis	NADH diphosphatase (pyrophosphatase)
KLLA0F15862g		YAL022C	FUN26	1.989	1.4503	0.477053	0.746972	N	Metabolism	cofactor - NAD homeostasis	High affinity nucleoside/nucleobase transporter, may regulate balance of nicotinamide riboside between cytosol and vacuole
KLLA0A00352g		YMR095C/YNL334C/YFL060C	SNO1/2/3	1.4198	1.20594	0.719792	0.138216	Y	Metabolism	cofactor - pyridoxine	Protein involved in pyridoxine (vitamin B6) biosynthesis; forms a glutamine amidotransferase complex with Snz1/2/3; single K.lactis gene is related to three similar S.cerevisiae genes
KLLA0A00374g		YMR096W/YNL333W/YFL059W	SNZ1/2/3	1.0289	1.32509	0.410755	-0.174909	Y	Metabolism	cofactor - pyridoxine	Protein involved in pyridoxine (vitamin B6) biosynthesis; interacts with Sno1p and Yhr198p; single K.lactis gene is related to three similar S.cerevisiae genes
KLLA0D17380g				3.5154	1.67313	0.995096	0.536969	N	Metabolism	cofactor - riboflavin	putative GTP cyclohydrolase II; involved in riboflavin metabolism
KLLA0C00220g		YHL040C/YHL047C	ARN1/ARN2	1.1257	1.1253	0.535646	0.525939	N	Metabolism	iron uptake	ARN family transporter for siderophore-iron chelates; one of several related subtelomeric K.lactis genes
KLLA0D11330g				1.1011	1.47043	-0.398703	-0.895976	N	Metabolism	nitrogen metabolism - allantoin	Related to DAL5 - Allantoate and ureidosuccinate permease of major facilitator family
KLLA0B14839g				1.5159	2.14277	-0.715878	-1.79728	N	Metabolism	phosphate uptake	putative acid phosphatase
KLLA0B06820g		YBR042C/YDR018C	CST26/YDR018C	1.7188	1.11329	-0.301482	-0.487272	N	Metabolism	phospholipid homeostasis	Putative transferase involved in phospholipid biosynthesis, transfers stearate to phosphatidyl inositol
KLLA0D16412g		YJL153C	INO1	1.2639	2.35635	0.997325	0.423267	N	Metabolism	phospholipid homeostasis	Inositol-3-phosphate synthase, synthesis of inositol phosphates and inositol-containing phospholipids, first committed step for all inositol compounds; reaction required NAD
KLLA0E23981g		YBR183W/YPL087W	YPC1/YDC1	1.9409	1.6658	-0.0231627	-0.32065	N	Metabolism	phospholipid homeostasis	Alkaline ceramidase, catalyzes both breakdown and synthesis of phytoceramide
KLLA0C14993g				1.5851	1.37162	0.612149	0.776058	N	Metabolism	possible secondary metabolite	Class III Extradiol dioxygenase, these enzymes use a non-heme Fe(II) to cleave aromatic rings between a hydroxylated carbon and an adjacent non-hydroxylated carbon; involved in pigment production in plants
KLLA0F19382g		YDR119W-A	COX26	2.1942	1.93694	0.933654	1.0497	N	Metabolism	respiration	promotes formation of respiratory supercomplex composed of Complex III (ubiquinol-cytochrome c reductase) and Complex IV (cytochrome c oxidase); one of two tandem genes related to ScCOX26
KLLA0F24552g		YBR026C	ETR1	6.7283	2.11865	0.285693	-0.393823	N	Metabolism	respiration	2-enoyl thioester reductase; member of medium chain dehydrogenase/reductase family; localized to mitochondria, where it has probable role in fatty acid synthesis; required for growth on non-fermentable carbon sources
KLLA0B01892g				1.1439	1.08803	-0.0799281	-0.261492	N	Other	mitochondrial protein homeostasis	Related to PIM1 - ATP-dependent Lon protease; involved in degradation of misfolded proteins in mitochondria
KLLA0E03983g		YPR151C	SUE1	1.0849	1.07081	0.467665	-0.208065	N	Other	mitochondrial protein homeostasis	Mitochondrial protein involved in degrading unstable proteins, such as cytochrome c
KLLA0F09790g		YBR230C	OM14	1.7766	1.73415	0.928731	0.281992	N	Other	mitochondrial protein homeostasis	Mitochondrial outer membrane receptor for cytosolic ribosomes, involved in import of nuclear-encoded mitochondrial proteins
KLLA0B07205g		YJL164C/YKL166C	TPK1/TPK3	1.1827	1.03153	-0.0908344	0.0406277	N	Other	signalling	cAMP-dependent protein kinase, promotes vegetative growth in response to nutrients via the Ras-cAMP signaling pathway
KLLA0C11539g		YGR161C	RTS3	5.1078	1.60412	0.939996	1.48438	N	Other	signalling	putative subunit protein phosphatase type 2A-like Sit4 complex
KLLA0F22297g		YLL019C	KNS1	3.5119	1.16975	0.478951	0.363906	N	Other	signalling	Protein kinase; effector kinase of the TOR signaling pathway and phosphorylates Rpc53p to negatively regulate ribosome and tRNA biosynthesis
KLLA0B07909g		YGR067C	YGR067C	0.9648	2.47376	0.588116	0.334469	N	Other	transcription factor	Putative zinc finger protein similar to Adr1p
KLLA0E24883g				1.1785	2.50963	0.516121	0.840779	N	Other	transporter	Putative transporter of Major Facilitator Superfamily
KLLA0A10791g		YFR010W	UBP6	2.3013	1.01967	0.420247	0.32971	N	Other	ubiquitin	ubiquitin protease; negatively regulates degradation of ubiquitinated proteins
KLLA0E00749g		YLL039C	UBI4	1.1319	1.3596	0.213083	-0.0241974	N	Other	ubiquitin	Ubiquitin
KLLA0A00242g		YCR010C/YNR002C	ADY2/ATO2	1.3182	3.90938	0.30962	-2.05864	N	Sexual Cycle	sporulation	acetate/ammonia transporter; may be required for sporulation; this K.lactis gene is highly similar to Kl syntenic ortholog of ScADY2/ATO2
KLLA0A08382g		YHR017W	YSC83	1.4649	1.55537	0.0406658	-0.371126	N	Sexual Cycle	sporulation	Mitochondrial protein induced during sporulation
KLLA0D00979g		YEL060C/YOR003W	PRB1/ YSP3	1.4202	1.76157	-0.734819	-1.18921	N	Sexual Cycle	sporulation	Serine protease of the subtilisin family, involved in protein degradation in vacuole and during sporulation
KLLA0E11881g		YCR010C/YNR002C	ADY2/ATO2	2.45	2.86881	-0.666564	-2.02443	N	Sexual Cycle	sporulation	acetate/ammonia transporter; may be required for sporulation; this K.lactis gene is syntenic ortholog of ScADY2/ATO2
KLLA0F02838g		YJL106W	IME2	1.8774	1.64149	0.452614	1.42155	N	Sexual Cycle	sporulation - regulation	Serine/threonine protein kinase involved in activation of meiosis
KLLA0F17006g	GSK3	YMR139W/YDL079C	RIM11/MRK1	1.286	1.00718	-0.142318	-1.03328	N	Sexual Cycle	sporulation - regulation	Protein kinase; required for signal transduction during entry into meiosis
KLLA0F20856g		YNL196C	SLZ1	1.8714	1.31633	-0.401346	-0.0733925	N	Sexual Cycle	sporulation - regulation	Subunit of MIS complex that methylates RNA in response to starvation
KLLA0B06798g		YBR043C	QDR3	1.7188	1.42639	-0.0407319	-0.139792	N	Sexual Cycle	sporulation - spore wall	Multidrug transporter of the major facilitator superfamily; involved in spore wall asembly; required for resistance to quinidine, barban, cisplatin, and bleomycin
KLLA0E24113g		YBR180W	DTR1	2.1484	1.50955	0.752683	0.983157	Y	Sexual Cycle	sporulation - spore wall	Putative dityrosine transporter of major facilitator superfamily; required for spore wall synthesis
KLLA0C11209g		YOL082W	ATG19	1.7805	1.57556	0.026244	-0.344056	N	Starvation Response	autophagy	Receptor protein for the cytoplasm-to-vacuole targeting (Cvt) pathway
KLLA0D19899g		YNL242W	ATG2	4.3713	1.09522	-0.340973	-0.639956	N	Starvation Response	autophagy	Peripheral membrane protein required for autophagic vesicle formation
KLLA0E09175g		YDL113C	ATG20	1.2109	1.57245	-0.010023	-0.26682	N	Starvation Response	autophagy	Sorting nexin family member; required for the cytoplasm-to-vacuole targeting (Cvt) pathway and for endosomal sorting
KLLA0F09768g		YGL124C	MON1	1.7766	1.04261	-0.292338	-0.691885	N	Starvation Response	autophagy	Subunit of heterodimeric guanine nucleotide exchange factor, membrane tethering and fusion events, required for autophagy, CVT pathway and mitophagy
KLLA0E14543g		YAR050W/YHR211W/YAL063C/YKR102W	FLO1/5/9/10	2.8182	2.02577	0.867752	0.228033	N	Starvation Response	cell adhesion	Lectin-like protein involved in flocculation; one of six similar K.lactis genes related to four similar S.cerevisiae genes
KLLA0E25147g				4.1713	2.62898	-0.223711	-2.20333	N	Starvation Response	cell adhesion	putative flocculin; has flocculin motif
KLLA0D14058g		YEL007W	MIT1	1.1348	1.59418	0.505697	-0.521496	N	Starvation Response	invasive growth	Transcriptional regulator of pseudohyphal growth
KLLA0F01903g				0.9145	2.24617	0.550927	1.2735	N	Starvation Response	protein turnover	Related to CPS1 - Vacuolar carboxypeptidase induced under low-nitrogen conditions
KLLA0C16225g		YPL223C/YMR175W	GRE1/SIP18	1.1079	1.25138	-0.189615	-0.672339	N	Stress Response	dessication	Phospholipid-binding hydrophilin, essential in desiccation-rehydration process
KLLA0C18117g		YGR008C/YLR327C	STF2/TMA10	1.9206	3.19188	-1.65613	-3.59019	N	Stress Response	dessication	Protein involved in resistance to desiccation stress; exhibits antioxidant properties
KLLA0F20658g		YDR038C/YDR039C/YDR040C	ENA5/2/1	1.1404	2.15271	0.582008	-0.852109	N	Stress Response	osmotic stress	P-type ATPase sodium pump; involved in Na+ and Li+ efflux to allow salt tolerance; one of two similar K.lactis genes orthologous to three tandemly duplicated S.cerevisiae genes
KLLA0B07557g		YKR066C	CCP1	1.0789	1.07842	0.730565	0.121084	N	Stress Response	oxidative stress	Mitochondrial cytochrome-c peroxidase, degrades reactive oxygen species in mitochondria
KLLA0B14476g		YGR234W	YHB1	5.4563	1.93814	-0.16349	-0.547842	N	Stress Response	oxidative stress	Nitric oxide oxidoreductase; flavohemoglobin that plays role in oxidative and nitrosative stress responses
KLLA0C05236g		YLR299W	ECM38	1.1421	1.0557	0.414311	0.37754	N	Stress Response	toxin	major glutathione-degrading enzyme; involved in detoxification of electrophilic xenobiotics
KLLA0D03476g		YOR153W/YDR406W/YOR328W	PDR5/15/10	1.9766	1.06289	-1.34337	-1.83541	N	Stress Response	toxin	ATP binding cassette (ABC) transporter; multidrug transporter implicated in cellular detoxification; one of four K.lactis genes similar to three S.cerevisiae genes
KLLA0D11000g		YOL151W/YGL157W/YGL039W/YDR541C	GRE2/ARI1/YGL039W/YDR541C	1.5207	1.44295	0.533472	0.168339	N	Stress Response	toxin	NADPH-dependent aldehyde reductase; may be stress induced; one of two tandemly duplicated K.lactis genes orthologous to four S.cerevisiae genes
KLLA0F19360g		YPL088W	YPL088W	2.1942	2.07739	0.681873	0.381541	N	Stress Response	toxin	Putative aryl alcohol dehydrogenase; coinduced with genes involved in multidrug resistance
KLLA0F21692g	PDR5	YOR153W/YDR406W/YOR328W	PDR5/15/10	5.8603	1.06306	0.369336	0.410828	N	Stress Response	toxin	ATP binding cassette (ABC) transporter; multidrug transporter implicated in cellular detoxification; one of four K.lactis genes similar to three S.cerevisiae genes
KLLA0A02431g				1.5038	1.3102	0.532543	0.00953994	N	Unknown	conserved protein	conserved protein of unknown function, DUF4303; other than BLAST hit in K.dobzhanskii, top hits in bacteria
KLLA0A04125g				0.9843	1.32429	-0.666359	-2.7791	N	Unknown	conserved protein	Related to YKR070W; Putative phosphohydrolase of the Class IIA subfamily of HAD superfamily
KLLA0B00451g				0.8861	1.28849	0.383101	-0.107776	N	Unknown	conserved protein	member of zinc-dependent/medium chain alcohol dehydrogenase family; potential formaldehyde dehydrogenase
KLLA0B03674g		YHR202W	YHR202W	2.1868	1.16578	0.0816712	-0.391424	N	Unknown	conserved protein	conserved protein of unknown function, N-terminal metallophosphatase domain
KLLA0B05995g				0.9965	1.4777	0.403815	-0.421482	N	Unknown	conserved protein	conserved protein of unknown function; DUF3445
KLLA0C00190g		YFR020W	CSS2	3.5009	2.14095	0.992549	1.03821	N	Unknown	conserved protein	Secreted protein of unknown function localized to ER and vacuole
KLLA0C18887g		YMR315W	YMR315W	1.2186	1.15814	0.474541	-0.21564	N	Unknown	conserved protein	NADP(H)-oxidoreductase of unknown function
KLLA0D07414g				3.5075	1.33472	0.371112	0.307429	N	Unknown	conserved protein	putative flavin-containing monooxygenase
KLLA0D15576g				1.7987	1.23708	0.667579	-0.505427	N	Unknown	conserved protein	conserved protein of unknown function
KLLA0D19929g				1.0831	2.8572	-0.550222	-0.283602	N	Unknown	conserved protein	member of zinc-dependent/medium chain alcohol dehydrogenase family; potential formaldehyde dehydrogenase
KLLA0E00309g				4.3184	1.4792	0.837097	1.55472	N	Unknown	conserved protein	putative aryl sulfatase; BLAST hits in a variety of fungi, many of which are not closely related to K.lactis
KLLA0E22397g				3.1674	1.4366	0.232963	-0.330389	N	Unknown	conserved protein	putative mannitol 2-dehydrogenase; catalyzes conversion of fructose to mannitol; member of short-chain dehydrogenase/reductase family
KLLA0E24003g				1.9409	1.10197	-0.0728101	-1.30453	N	Unknown	conserved protein	putative mannitol 2-dehydrogenase; catalyzes conversion of fructose to mannitol; member of short-chain dehydrogenase/reductase family
KLLA0E24861g				1.1785	1.65228	-0.643465	-0.38577	N	Unknown	conserved protein	serine-rich protein of unknown function
KLLA0F18370g				1.2567	1.38344	0.0905065	-0.342884	N	Unknown	conserved protein	conserved protein of unknown function
KLLA0F19965g		YLR108C/YDR132C	YLR108C/YDR132C	0.8952	1.03116	0.951816	1.04206	N	Unknown	conserved protein	conserved protein of unknown function localized to nucleus
KLLA0F26818g		YKL065W-A	YKL065W-A	2.2043	2.70388	-0.205262	-1.86949	N	Unknown	conserved protein	conserved protein of unknown function localized to ER and vacuole
KLLA0F27819g		YIL024C	YIL024C	3.2885	2.8126	0.760805	-0.350316	N	Unknown	conserved protein	conserved protein of unknown function
KLLA0A11088g				2.6249	1.01797	-0.0639791	-0.270106	N	Unknown	limited homology	BLAST hits in Kluyveromyces species only
KLLA0C00242g				6.8376	1.75302	0.135052	0.794328	N	Unknown	limited homology	BLAST hit in K. lactis only
